# Supplementary material for: Evolution of the Symbiosis-Specific GRAS Regulatory Network in Bryophytes
Source: Front Plant Sci. 2018 Nov 6;9:1621. doi: 10.3389/fpls.2018.01621 (PMC6232258; doi:10.3389/fpls.2018.01621)
Supplement: TABLE S1 — Lists the sources of genomic and transcriptomic datasets used, five letter species abbreviations used in the Figures, BUSCO completeness percentages and expression data for the P. patens NSP1 paralogs. Alignments of NSP1, NSP2, and RAD1/RAM1 used for the phylogenetic analyses shown in Figures 2–4. [file Table_1.xlsx]

## Sheet: Data sources
5letter code	kingdom/super group	clade/phylum	supergroup2	order	family	species	taxID from NCBI	data type	version	Pubmed ID paper	URL source	non-URL source	publicly available	BUSCO completeness
PICAB	Archaeplastida	Acrogymnospermae	Coniferophyta	Pinales	Pinaceae	Picea abies	3329	genome	1	23698360	ftp://plantgenie.org/Data/ConGenIE/Picea_abies/v1.0/FASTA/GenePrediction/Pabies1.0-LC-pep.faa.gz+ftp://plantgenie.org/Data/ConGenIE/Picea_abies/v1.0/FASTA/GenePrediction/Pabies1.0-MC-pep.faa.gz		yes
ANTAG	Archaeplastida	Anthocerotopsida	-	Anthocerotales	Anthocerotaceae	Anthoceros agrestis	41834	genome	n.a.	unpublished			no
AMBTR	Archaeplastida	basal Magnoliophyta	-	Amborellales	Amborellaceae	Amborella trichopoda	13333	genome	1.0	24357323	ftp://ftp.ncbi.nlm.nih.gov/genomes/all/GCF_000471905.2_AMTR1.0/GCF_000471905.2_AMTR1.0_protein.faa.gz + https://genome.jgi.doe.gov/pages/dynamicOrganismDownload.jsf?organism=Atrichopoda	Phyzozome V12	yes
SPHFA	Archaeplastida	Bryophyta	Sphagnopsida	Sphagnales	Sphagnaceae	Sphagnum fallax	53036	genome	0.5	unpublished	https://genome.jgi.doe.gov/pages/dynamicOrganismDownload.jsf?organism=Sfallax	Phytozome V12	yes
TAKLE	Archaeplastida	Bryophyta	Takakiophytina	Takakiales	Takakiaceae	Takakia lepidozioides	37425	genome	n.a.	unpublished			no
PHYPA	Archaeplastida	Bryopsida	Funariidae	Funariales	Funariaceae	Physcomitrella patens	3218	genome	3.3	29237241	http://genome.jgi.doe.gov/pages/dynamicOrganismDownload.jsf?organism=PhytozomeV11/PhytozomeV11: Ppatens_318_v3.3.protein.fa.gz	Phytozome V12	yes
CERPUtr	Archaeplastida	Bryopsida	Dicranidae	Dicranales	Ditrichaceae	Ceratodon purpureus	3225	transcriptome	n.a.	24862584		see paper	yes	0.94
FUNHYtr	Archaeplastida	Bryopsida	Funariidae	Funariales	Funariaceae	Funaria hygrometrica	29583	transcriptome	n.a.	20855429		see paper	yes	0.964
VITVI	Archaeplastida	eudicots	rosids	Vitales	Vitaceae	Vitis vinifera	29760	genome	Genoscope.12X	17721507	ftp://ftp.ncbi.nlm.nih.gov/genomes/all/GCF_000003745.3_12X/GCF_000003745.3_12X_protein.faa.gz + https://genome.jgi.doe.gov/pages/dynamicOrganismDownload.jsf?organism=Vvinifera	Phytozome V12	yes
NICBE	Archaeplastida	eudicots	asterids	Solanales	Solanaceae	Nicotiana benthamiana	4100	genome	1.0	22876960	ftp://ftp.solgenomics.net/genomes/Nicotiana_benthamiana/annotation/Niben101/Niben101_annotation.proteins.fasta.gz		yes
MIMGU	Archaeplastida	eudicots	asterids	Lamiales	Phrymaceae	Mimulus guttatus	4155	genome	2.0	24225854	ftp://ftp.ncbi.nlm.nih.gov/genomes/all/GCF_000504015.1_Mimgu1_0/GCF_000504015.1_Mimgu1_0_protein.faa.gz + https://genome.jgi.doe.gov/pages/dynamicOrganismDownload.jsf?organism=Mguttatus	Phytozome V12	yes
AETAR	Archaeplastida	eudicots	rosids	Brassicales	Brassicaceae	Aethionema arabicum	228871	genome	2.5	23817568	https://genomevolution.org/coge/OrganismView.pl?gid=23428		yes
ARATH	Archaeplastida	eudicots	rosids	Brassicales	Brassicaceae	Arabidopsis thaliana	3702	genome	TAIR10	11130711, 22140109	https://genome.jgi.doe.gov/pages/dynamicOrganismDownload.jsf?organism=Athaliana	Phytozome V12	yes
CARPA	Archaeplastida	eudicots	rosids	Brassicales	Caricaceae	Carica papaya	3649	genome	0.4	18432245	https://genome.jgi.doe.gov/pages/dynamicOrganismDownload.jsf?organism=Cpapaya		yes
LOTJA	Archaeplastida	eudicots	rosids	Fabales	Fabaceae	Lotus japonicus	34305	genome	1.0	18511435	ftp://ftp.kazusa.or.jp/pub/lotus/lotus_r2.5/Lj2.5_proteins.faa.gz		yes
MEDTR	Archaeplastida	eudicots	rosids	Fabales	Fabaceae	Medicago truncatula	3880	genome	Mt4.0v1	22089132, 24767513	ftp://ftp.ncbi.nlm.nih.gov/genomes/all/GCF_000219495.2_MedtrA17_4.0/GCF_000219495.2_MedtrA17_4.0_protein.faa.gz + https://genome.jgi.doe.gov/pages/dynamicOrganismDownload.jsf?organism=Mtruncatula	Phytozome V12	yes
ORYSAJA	Archaeplastida	Liliopsida	commelinids	Poales	Poaceae	Oryza sativa (spp. japonica)	4530	genome	7.0	24280374, 17145706	ftp://ftp.ncbi.nlm.nih.gov/genomes/all/GCF_000005425.2_Build_4.0/GCF_000005425.2_Build_4.0_protein.faa.gz + https://genome.jgi.doe.gov/pages/dynamicOrganismDownload.jsf?organism=Osativa	Phytozome V12	yes
PHODA	Archaeplastida	Liliopsida	commelinids	Arecales	Arecaceae	Phoenix dactylifera	42345	genome	1.0	21623354, 22655034	ftp://ftp.ncbi.nlm.nih.gov/genomes/all/GCF_000413155.1_DPV01/GCF_000413155.1_DPV01_protein.faa.gz		yes
SELMO	Archaeplastida	Lycopodiidae	Lycopodiales	Selaginellales	Selaginellaceae	Selaginella moellendorffii	88036	genome	1.0	21551031	https://genome.jgi.doe.gov/pages/dynamicOrganismDownload.jsf?organism=Smoellendorffii	Phytozome V12	yes
MARPO	Archaeplastida	Marchantiophyta	Marchantiopsida	Marchantiales	Marchantiaceae	Marchantia polymorpha	3197	genome	3.1	28985561	https://genome.jgi.doe.gov/pages/dynamicOrganismDownload.jsf?organism=Mpolymorpha	Phytozome V12	yes
MARPOtr	Archaeplastida	Marchantiophyta	Marchantiopsida	Marchantiales	Marchantiaceae	Marchantia polymorpha	3197	transcriptome	n.a.	24841988		see paper	yes	0.976
MICMAtr	Archaeplastida	Moniliformopses	Polypodiidae	Polypodiales	Dennstaedtiaceae	Microlepia marginata	749682	transcriptome	n.a.	unpublished		own data	no	0.874
													sequences available via alignments (supplementary material)

## Sheet: 1kp
group	1kp code	5letter	species	NCBI taxid	BUSCO completeness
hornworts	UCRN	MEGFL_UCRN	Megaceros flagellaris	263821	0.789
hornworts	TCBC	NOTVI_TCBC	Nothoceros vincentianus	56934	0.772
hornworts	FAJB	PARHA_FAJB	Paraphymatoceros hallii	1263704	0.805
hornworts	RXRQ	PHACA_RXRQ	Phaeoceros carolinianus	185665	0.921
liverworts	WZYK	BAZTR_WZYK	Bazzania trilobata	13808	0.765
liverworts	RTMU	CALFI_RTMU	Calypogeia fissa	362796	0.729
liverworts	ILBQ	CONCO_ILBQ	Conocephalum conicum	41839	0.868
liverworts	TXVB	LUNCR_TXVB	Lunularia cruciata	56931	0.911
liverworts	HMHL	MARPA_HMHL	Marchantia paleacea	56867	0.888
liverworts	IHWO	MARPA_IHWO	Marchantia paleacea	56867	0.888
liverworts	JPYU	MARPO_JPYU	Marchantia polymorpha	3197	0.829
liverworts	NRWZ	METCR_NRWZ	Metzgeria crassipilis	1408784	0.805
liverworts	YBQN	ODOPR_YBQN	Odontoschisma prostratum	526359	0.798
liverworts	YFPG	PALLY_YFGP	Pallavicinia lyellii	56939	0.822
liverworts	PIUF	PELCF_PIUF	Pellia cf. Epiphylla	40339	0.832
liverworts	JHFI	PELNE_JHFI	Pellia neesiana	70144	0.881
liverworts	NWQC	PLAAS_NWQC	Plagiochila asplenioides	65053	0.911
liverworts	WJLO	RICNA_WJLO	Ricciocarpos natans	53035	0.861
liverworts	IRBN	SCANE_IRBN	Scapania nemorosa	41848	0.951
mosses	WOGB	ANDRU_WOGB	Andreaea rupestris	13797	0.874
mosses	QMWB	ANOAT_QMWB	Anomodon attenuatus	119543	0.822
mosses	WNGH	AULHE_WNGH	Aulacomnium heterostichum	171832	0.887
mosses	JMXW	BRYAR_JMXW	Bryum argenteum	37413	0.776
mosses	TAVP	CALCO_TAVP	Calliergon cordifolium	671105	0.815
mosses	FFPD	CERPU_FFPD	Ceratodon purpureus	3225	0.842
mosses	VBMM	CLARO_VBMM	Claopodium rostratum	169504	0.914
mosses	MIRS	CLIDE_MIRS	Climacium dendroides	70131	0.7
mosses	NGTD	DICSC_NGTD	Dicranum scoparium	3222	0.871
mosses	AWOI	DIPFO_AWOI	Diphyscium foliosum	82928	0.91
mosses	KEFD	ENCST_KEFD	Encalypta streptocarpa	81092	0.779
mosses	DHWX	FONAN_DHWX	Fontinalis antipyretica	67435	0.779
mosses	YWNF	HEDCI_YWNF	Hedwigia ciliata	52988	0.914
mosses	VMXJ	LEUAL_VMXJ	Leucobryum albidum	175169	0.924
mosses	RGKI	LEUGL_RGKI	Leucobryum glaucum	94688	0.743
mosses	ZACW	LEUBR_ZACW	Leucodon brachypus	94541	0.931
mosses	IGUH	SCHFA_IGUH	Leucodon julaceus	129283	0.927
mosses	WSPM	LOEBR_WSPM	Loeskeobryum brevirostre	94452	0.802
mosses	TMAJ	NECDO_TMAJ	Neckera douglasii	140378	0.931
mosses	CMEQ	ORTLY_CMEQ	Orthotrichum lyellii	61563	0.925
mosses	ORKS	PHIFO_ORKS	Philonotis fontana	67415	0.872
mosses	YEPO	PHYSP_YEPO	Physcomitrium sp.	37414	0.898
mosses	BGXB	PLAIN_BGXB	Plagiomnium insigne	259530	0.746
mosses	QKQO	PSEEL_QKQO	Pseudotaxiphyllum elegans	186706	0.917
mosses	ABCD	RACEL_ABCD	Racomitrium elongatum	71396	0.703
mosses	RDOO	RACVA_RDOO	Racomitrium varium	1286318	0.951
mosses	JADL	RHYSE_JADL	Rhynchostegium serrulatum	283383	0.852
mosses	XWHK	ROSCA_XWHK	Rosulabryum cf. capillare	188013	0.627
mosses	BPSG	SCOAQ_BPSG	Scouleria aquatica	67421	0.905
mosses	LNSF	STESU_LNSF	Stereodon subimponens	1042168	0.855
mosses	GRKU	SYNPR_GRKU	Syntrichia princeps	487417	0.762
mosses	SKQD	TAKLE_SKQD	Takakia lepidozioides	37425	0.848
mosses	HVBQ	TETPE_HVBQ	Tetraphis pellucida	37420	0.821
mosses	EEMJ	THUDE_EEMJ	Thuidium delicatulum	94606	0.673
mosses	ZQRI	TIMAU_ZQRI	Timmia austriaca	108613	0.901
				average	0.841167

## Sheet: P. patens NSP1 heatmap
	Expression heatmap of the four P. patens NSP1 paralogs
	Data from Perroud et al. (2018) Plant J 95:168-182
